# Supplementary material for: Live Simultaneous Monitoring of Mineral Deposition and Lipid Accumulation in Differentiating Stem Cells
Source: MDPI journal article supplement (doi:10.3390/biomimetics4030048), 2019-07-10
Supplement: s1 [file s1]

## Supplementary Information

### Live Simultaneous Monitoring of Mineral Deposition and Lipid Accumulation in Differentiating Stem Cells

Nigel De Melo, Sarah McGinlay, Robert Markus, Laura Macri-Pellizzeri, Michael E. Symonds, Ifty Ahmed and Virginie Sottile \*

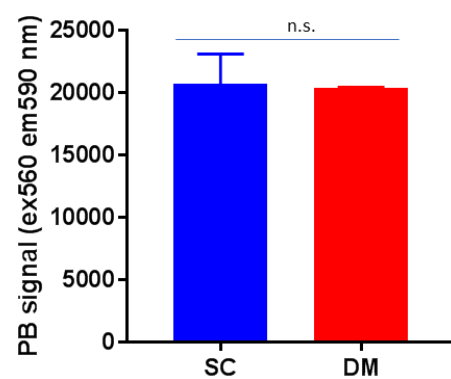

**Figure 1.** Metabolic activity assay carried out at day 25.
